# Supplementary material for: Pharmacologic Treatment of Acute Migraine in the Pediatric Emergency Department: A Systematic Review and Meta-analysis of Randomized Controlled Trials
Source: Research Square preprint supplement (doi:10.21203/rs.3.rs-8885764/v1), 2026-02-23
Supplement: Supplementary file 1 [file 8108adf07faf9c91ad0afad3.docx]

**Supplementary Files**

**Supplementary Table 1: Search strategy across included studies**

| Database | Search strategy | Results |
| --- | --- | --- |
| PubMed | ("migrain*"[All Fields] OR "hemicrania"[All Fields] OR "primary headache"[All Fields] OR "vascular headache"[All Fields] OR "Unilateral headache"[All Fields] OR "Sick Headache"[All Fields]) AND ("pediatr*"[All Fields] OR "child*"[All Fields] OR "adolescen*"[All Fields] OR "paediatr*"[All Fields] OR "infan*"[All Fields] OR ("toddler"[All Fields] OR "toddler s"[All Fields] OR "toddlers"[All Fields]) OR ("juvenile"[All Fields] OR "juvenile s"[All Fields] OR "juveniles"[All Fields] OR "juvenility"[All Fields]) OR "minor*"[All Fields] OR ("adolescent"[MeSH Terms] OR "adolescent"[All Fields] OR "youth"[All Fields] OR "youths"[All Fields] OR "youth s"[All Fields]) OR ("adolescent"[MeSH Terms] OR "adolescent"[All Fields] OR "teen"[All Fields]) OR "School-age"[All Fields] OR "Young person"[All Fields] OR "Young people"[All Fields]) AND ("emergen*"[All Fields] OR "urgen*"[All Fields] OR "episod*"[All Fields] OR ("triage"[MeSH Terms] OR "triage"[All Fields] OR "triages"[All Fields] OR "triaged"[All Fields] OR "triaging"[All Fields]) OR ("education"[MeSH Subheading] OR "education"[All Fields] OR "ed"[All Fields]) OR ("acute"[All Fields] OR "acutely"[All Fields] OR "acutes"[All Fields]) OR ("attack"[All Fields] OR "attacked"[All Fields] OR "attacker"[All Fields] OR "attackers"[All Fields] OR "attacking"[All Fields] OR "attacks"[All Fields]) OR ("crisis"[Journal] OR "crisis"[All Fields]) OR "immedia*"[All Fields]) AND ("RCT"[All Fields] OR "random*"[All Fields]) | 1041 |
| Scopus | TITLE-ABS-KEY ( ( migrain* OR hemicrania OR "primary headache" OR "vascular headache" OR "Unilateral headache" OR "Sick Headache" ) AND ( pediatr* OR child* OR adolescen* OR paediatr* OR infan* OR Toddler OR Juvenile OR Minor* OR Youth OR Teen OR School-age OR "Young person" OR "Young people" ) AND ( emergen* OR urgen* OR episod* OR triage OR ED OR acute OR attack OR crisis OR immedia* ) AND ( RCT OR random* ) ) | 1101 |
| Cochrane Library | ((migrain* OR hemicrania OR "primary headache" OR "vascular headache" OR "Unilateral headache" OR "Sick Headache") AND (pediatr* OR child* OR adolescen* OR paediatr* OR infan* OR Toddler OR Juvenile OR Minor* OR Youth OR Teen OR School-age OR "Young person" OR "Young people") AND (emergen* OR urgen* OR episod* OR triage OR ED OR acute OR attack OR crisis OR immedia*) AND (RCT OR random*)):ti,ab,kw | 824 |
| Web of Science | ALL=((migrain* OR hemicrania OR "primary headache" OR "vascular headache" OR "Unilateral headache" OR "Sick Headache") AND (pediatr* OR child* OR adolescen* OR paediatr* OR infan* OR Toddler OR Juvenile OR Minor* OR Youth OR Teen OR School-age OR "Young person" OR "Young people") AND (emergen* OR urgen* OR episod* OR triage OR ED OR acute OR attack OR crisis OR immedia*) AND (RCT OR random*)) | 474 |
| Embase | (migrain*:ti,ab,kw OR hemicrania:ti,ab,kw OR 'primary headache':ti,ab,kw OR 'vascular headache':ti,ab,kw OR 'unilateral headache':ti,ab,kw OR 'sick headache':ti,ab,kw) AND (pediatr*:ti,ab,kw OR child*:ti,ab,kw OR adolescen*:ti,ab,kw OR paediatr*:ti,ab,kw OR infan*:ti,ab,kw OR toddler:ti,ab,kw OR juvenile:ti,ab,kw OR minor*:ti,ab,kw OR youth:ti,ab,kw OR teen:ti,ab,kw OR 'school age':ti,ab,kw OR 'young person':ti,ab,kw OR 'young people':ti,ab,kw) AND (emergen*:ti,ab,kw OR urgen*:ti,ab,kw OR episod*:ti,ab,kw OR triage:ti,ab,kw OR ed:ti,ab,kw OR acute:ti,ab,kw OR attack:ti,ab,kw OR crisis:ti,ab,kw OR immedia*:ti,ab,kw) AND (rct:ti,ab,kw OR random*:ti,ab,kw) | 531 |
